# Supplementary material for: Hotspot mutations delineating diverse mutational signatures and biological utilities across cancer types
Source: PubMed Central journal article supplement (PMC4928158; doi:10.1186/s12864-016-2727-x), 2016-06-23
Supplement: 12864_2016_2727_MOESM1_ESM.pdf [file 12864_2016_2727_MOESM1_ESM.pdf]

**Additional file 1: Table S1 Number of samples in 17 tumor types in COSMIC v71**

| <b>Tumor Type</b>    | <b>COSMIC samples *</b> | <b>WGS&amp;WEX ^</b> | <b>Exclude Hyper-mutator #</b> |
|----------------------|-------------------------|----------------------|--------------------------------|
| <b>Bladder</b>       | 3872                    | 364                  | 358                            |
| <b>Bone</b>          | 704                     | 81                   | 79                             |
| <b>Brain</b>         | 8457                    | 1366                 | 1354                           |
| <b>Breast</b>        | 4994                    | 1152                 | 1140                           |
| <b>Colon</b>         | 29413                   | 694                  | 684                            |
| <b>Endometrium</b>   | 2293                    | 271                  | 260                            |
| <b>Head&amp;Neck</b> | 3036                    | 710                  | 699                            |
| <b>Kidney</b>        | 3616                    | 879                  | 867                            |
| <b>Liver</b>         | 2448                    | 900                  | 890                            |
| <b>Lung</b>          | 10520                   | 969                  | 951                            |
| <b>Myeloid</b>       | 52500                   | 1344                 | 1336                           |
| <b>Ovarian</b>       | 3378                    | 647                  | 640                            |
| <b>Pancreas</b>      | 5561                    | 800                  | 789                            |
| <b>Prostate</b>      | 953                     | 508                  | 501                            |
| <b>Skin</b>          | 9072                    | 655                  | 650                            |
| <b>Stomach</b>       | 3615                    | 621                  | 613                            |
| <b>Thyroid</b>       | 13967                   | 444                  | 439                            |

\* Number of samples that were collected by COSMIC v71; ^ Number of samples that were subjected to either whole genome or whole exome sequencing; # Number of samples after excluding samples that were shown to be hyper-mutated.
