# Supplementary material for: Hotspot mutations delineating diverse mutational signatures and biological utilities across cancer types
Source: PubMed Central journal article supplement (PMC4928158; doi:10.1186/s12864-016-2727-x), 2016-06-23
Supplement: 12864_2016_2727_MOESM2_ESM.pdf [file 12864_2016_2727_MOESM2_ESM.pdf]

**Additional file 2: Table S2** 20 mutation subtypes that were included in the statistical modeling of hotspot mutation definition

---

| <b>Mutation_subtype</b>           |
|-----------------------------------|
| Missense A/T transition           |
| Missense A/T transversion         |
| Missense non-CpG C/G transition   |
| Missense non-CpG C/G transversion |
| Missense CpG C/G transition       |
| Missense CpG C/G transversion     |
| Nonsense A/T transition           |
| Nonsense A/T transversion         |
| Nonsense non-CpG C/G transition   |
| Nonsense non-CpG C/G transversion |
| Nonsense CpG C/G transition       |
| Nonsense CpG C/G transversion     |
| Silent A/T transition             |
| Silent A/T transversion           |
| Silent non-CpG C/G transition     |
| Silent non-CpG C/G transversion   |
| Silent CpG C/G transition         |
| Silent CpG C/G transversion       |
| Insertion                         |
| Deletion                          |

---
