# Supplementary material for: Hotspot mutations delineating diverse mutational signatures and biological utilities across cancer types
Source: PubMed Central journal article supplement (PMC4928158; doi:10.1186/s12864-016-2727-x), 2016-06-23
Supplement: 12864_2016_2727_MOESM3_ESM.pdf [file 12864_2016_2727_MOESM3_ESM.pdf]

**Additional file 3: Table S3** Number of samples available in different TCGA cancer types.

| <b>Abbreviation</b> | <b>Tumor_Type</b>                     | <b>Mutation</b> | <b>RNA</b> | <b>RPPA</b> | <b>Mutation&amp;RNA</b> | <b>Mutation&amp;RPPA</b> |
|---------------------|---------------------------------------|-----------------|------------|-------------|-------------------------|--------------------------|
| <b>BRCA</b>         | Breast Invasive Carcinoma             | 772             | 817        | 748         | 752                     | 637                      |
| <b>KIRC</b>         | Kidney Renal Clear Cell Carcinoma     | 417             | 470        | 455         | 391                     | 386                      |
| <b>THCA</b>         | Thyroid Carcinoma                     | 323             | 426        | NA          | 303                     | NA                       |
| <b>OV</b>           | Ovarian Serous Cystadenocarcinoma     | 316             | 263        | 413         | 163                     | 210                      |
| <b>HNSC</b>         | Head & Neck Squamous Cell Carcinoma   | 306             | 303        | 213         | 299                     | 208                      |
| <b>GBM</b>          | Glioblastoma Multiforme               | 291             | 161        | 216         | 150                     | 146                      |
| <b>SKCM</b>         | Skin Cutaneous Melanoma               | 253             | NA         | NA          | NA                      | NA                       |
| <b>UCEC</b>         | Uterine Corpus Endometrioid Carcinoma | 248             | 333        | 404         | 239                     | 203                      |
| <b>LUAD</b>         | Lung Adenocarcinoma                   | 230             | 353        | 238         | 169                     | 135                      |
| <b>COAD-READ</b>    | Colon & Rectum Adenocarcinoma         | 224             | 263        | 466         | 217                     | 157                      |
| <b>LAML</b>         | Acute Myeloid Leukemia                | 194             | 173        | NA          | 169                     | NA                       |
| <b>LUSC</b>         | Lung Squamous Cell Carcinoma          | 178             | 220        | 196         | 177                     | 112                      |
| <b>LGG</b>          | Brain Lower Grade Glioma              | 170             | 205        | NA          | 166                     | NA                       |
| <b>STAD</b>         | Stomach Adenocarcinoma                | 151             | 58         | NA          | 58                      | NA                       |
| <b>KIRP</b>         | Kidney Renal Papillary Cell Carcinoma | 100             | 78         | NA          | 77                      | NA                       |
| <b>BLCA</b>         | Bladder Urothelial Carcinoma          | 99              | 96         | 128         | 95                      | 92                       |
| <b>PRAD</b>         | Prostate Adenocarcinoma               | 83              | 142        | NA          | 72                      | NA                       |
| <b>CESC</b>         | Cervical Squamous Cell Carcinoma      | 39              | 97         | NA          | 38                      | NA                       |
| <b>PAAD</b>         | Pancreatic Adenocarcinoma             | 34              | 41         | NA          | 19                      | NA                       |

Note: The number of samples with somatic mutation data, RNA expression data, RPPA data, or both data types (Mutation&RNA and Mutation&RPPA) in each TCGA cancer type.
