# Supplementary material for: Hotspot mutations delineating diverse mutational signatures and biological utilities across cancer types
Source: PubMed Central journal article supplement (PMC4928158; doi:10.1186/s12864-016-2727-x), 2016-06-23
Supplement: 12864_2016_2727_MOESM4_ESM.pdf [file 12864_2016_2727_MOESM4_ESM.pdf]

**Additional file 4: Table S4** 2×2 table of calculating the prevalence of target mutation **B** in samples **A**

|                                                            |                                                               |
|------------------------------------------------------------|---------------------------------------------------------------|
| Number of <b>A</b> samples<br>with <b>B</b> mutations      | Number of <b>A</b> samples<br>without <b>B</b> mutations      |
| Number of non- <b>A</b> samples<br>with <b>B</b> mutations | Number of non- <b>A</b> samples<br>without <b>B</b> mutations |
