# Supplementary material for: Hotspot mutations delineating diverse mutational signatures and biological utilities across cancer types
Source: PubMed Central journal article supplement (PMC4928158; doi:10.1186/s12864-016-2727-x), 2016-06-23
Supplement: 12864_2016_2727_MOESM10_ESM.pdf [file 12864_2016_2727_MOESM10_ESM.pdf]

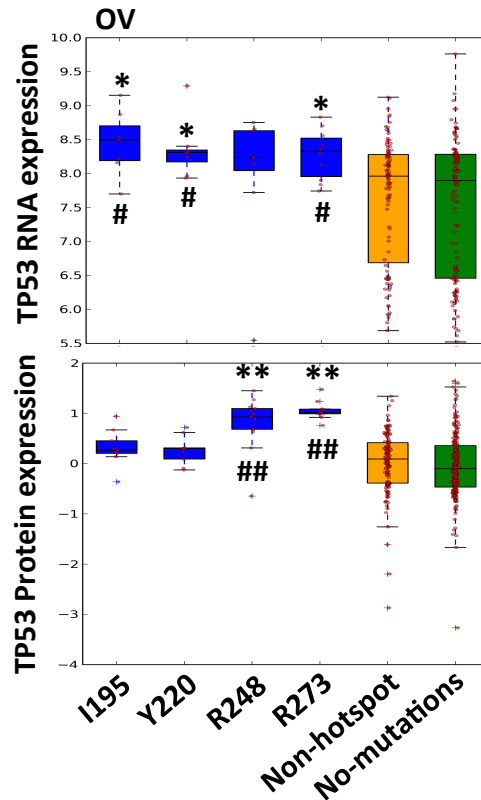

**Additional file 10: Figure S5 Functional implications of hotspot mutations in RNA and protein expression.** In OV, tumor samples with missense hotspot mutations (I195, Y220, R248 and R273) in *TP53* show higher *TP53* RNA and protein expression than those with non-hotspot mutations and without *TP53* mutations. \* indicates  $p < 0.05$  and \*\* indicates  $p < 0.001$  between samples with specified hotspot mutations and samples with non-hotspot mutations in examined gene; # indicates  $p < 0.05$  and ## indicates  $p < 0.001$  between samples with specified hotspot mutations and samples without mutations in examined gene.
