# Supplementary material for: Hotspot mutations delineating diverse mutational signatures and biological utilities across cancer types
Source: PubMed Central journal article supplement (PMC4928158; doi:10.1186/s12864-016-2727-x), 2016-06-23
Supplement: 12864_2016_2727_MOESM11_ESM.pdf [file 12864_2016_2727_MOESM11_ESM.pdf]

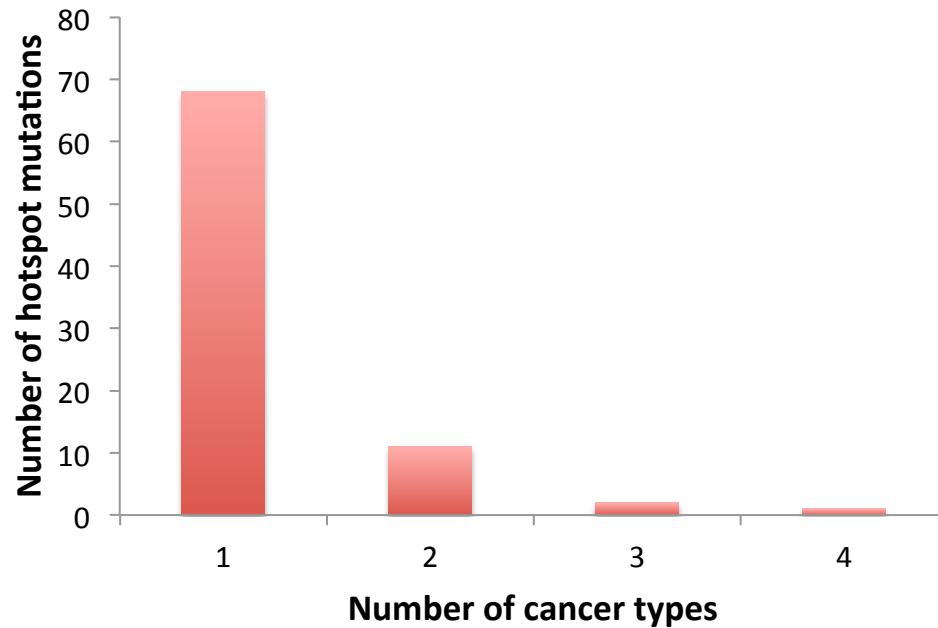

**Additional file 11: Figure S6 Prevalence of hotspot mutations in different TCGA cancer types.** 82 hotspot mutations were highly prevalent in one or more cancer types. Most are highly prevalent in only one tumor type, while a few were in two or more tumor types.
