# Supplementary material for: Hotspot mutations delineating diverse mutational signatures and biological utilities across cancer types
Source: PubMed Central journal article supplement (PMC4928158; doi:10.1186/s12864-016-2727-x), 2016-06-23
Supplement: 12864_2016_2727_MOESM12_ESM.pdf [file 12864_2016_2727_MOESM12_ESM.pdf]

**Additional file 12: Table S6** Hotspot mutations exclusively detected in only one tumor type in TCGA pan-cancer data.

| Tumor_Type | Gene     | aaPosition | Frequency | Adj.Pvalue |
|------------|----------|------------|-----------|------------|
| BLCA       | RXRA     | S427       | 5.00%     | 4.26E-08   |
| BRCA       | GATA3    | P409       | 1.60%     | 5.48E-09   |
| BRCA       | GOLGA6L2 | E537       | 0.90%     | 1.27E-04   |
| BRCA       | MAGI1    | Q421       | 0.80%     | 4.95E-04   |
| COAD&READ  | APC      | R876       | 5.30%     | 4.01E-14   |
| KIRC       | NEFH     | P655       | 0.70%     | 2.16E-03   |
| LAML       | FLT3     | D835       | 8.20%     | 1.94E-21   |
| LAML       | NPM1     | W288       | 25.60%    | 1.58E-69   |
| LAML       | DNMT3A   | R882       | 14.90%    | 4.24E-38   |
| SKCM       | AGAP10   | M293       | 2.80%     | 1.62E-08   |
| SKCM       | C15orf23 | S24        | 2.80%     | 1.62E-08   |
| SKCM       | PCDHGA1  | R293       | 2.00%     | 3.48E-06   |
| SKCM       | TRRAP    | S722       | 1.60%     | 4.83E-05   |
| STAD       | BMPR2    | N583       | 2.00%     | 1.49E-04   |
| STAD       | CCDC43   | R216       | 2.00%     | 1.49E-04   |
| STAD       | ESRP1    | N512       | 3.30%     | 3.25E-07   |
| STAD       | FAM18A   | F140       | 2.00%     | 1.49E-04   |
| STAD       | GTF2I    | N440       | 2.00%     | 1.49E-04   |
| STAD       | STAMBPL1 | K405       | 2.00%     | 1.49E-04   |
| STAD       | ZNF365   | K399       | 2.00%     | 1.49E-04   |
| STAD       | CNBD1    | L396       | 2.00%     | 4.68E-04   |
| STAD       | DOCK3    | P1852      | 6.60%     | 2.47E-13   |
| STAD       | PGM5     | I98        | 10.50%    | 5.36E-22   |
| STAD       | SLC3A2   | K331       | 2.60%     | 3.15E-05   |
| STAD       | UBR5     | E2121      | 5.30%     | 1.72E-10   |
| UCEC       | FGFR2    | S252       | 3.60%     | 6.31E-11   |
| UCEC       | MAX      | H28        | 1.60%     | 4.55E-05   |
| UCEC       | BCOR     | N1459      | 3.20%     | 7.14E-09   |
| UCEC       | PIK3CA   | R93        | 2.40%     | 1.25E-06   |

Note: Frequency was calculated by dividing number of mutations over number of samples in specific tumor type; adjusted p-value was computed based on Fisher's exact test followed by FDR correction.
